# Supplementary material for: A one-step method for generating antimicrobial nanofibre meshes via coaxial electrospinning
Source: Royal Society of Chemistry journal article supplement (doi:10.1039/d4ma00125g), 2024-01-01
Supplement: d4ma00125g1.pdf [file d4ma00125g1.pdf]

## Supplementary Information

# A one-step method for generating antimicrobial nanofibre meshes via coaxial electrospinning

Fangyuan Zhang<sup>1</sup>, Amy I. Jacobs<sup>2</sup>, Maximillian Woodall<sup>2</sup>, Helen C. Hailes,<sup>3</sup> Ijeoma F. Uchegbu,<sup>1</sup> Delmiro Fernandez-Reyes,<sup>4</sup>  
Claire M. Smith<sup>2</sup>, Karolina Dziemidowicz<sup>1\*</sup> and Gareth R. Williams<sup>1\*</sup>

<sup>1</sup> UCL School of Pharmacy, University College London, 29-39 Brunswick Square, London, WC1N 1AX, United Kingdom

<sup>2</sup> UCL Great Ormond Street Institute of Child Health, University College London, 30 Guilford Street, London, WC1N 1EH,  
United Kingdom

<sup>3</sup> Department of Chemistry, University College London, 20 Gordon Street Kings Cross London WC1H 0AJ

<sup>4</sup> Department of Computer Science, University College London, 66-72 Gower Street, London, WC1E 6EA, United Kingdom

\* Authors for correspondence. Email: k.dziemidowicz@ucl.ac.uk; g.williams@ucl.ac.uk

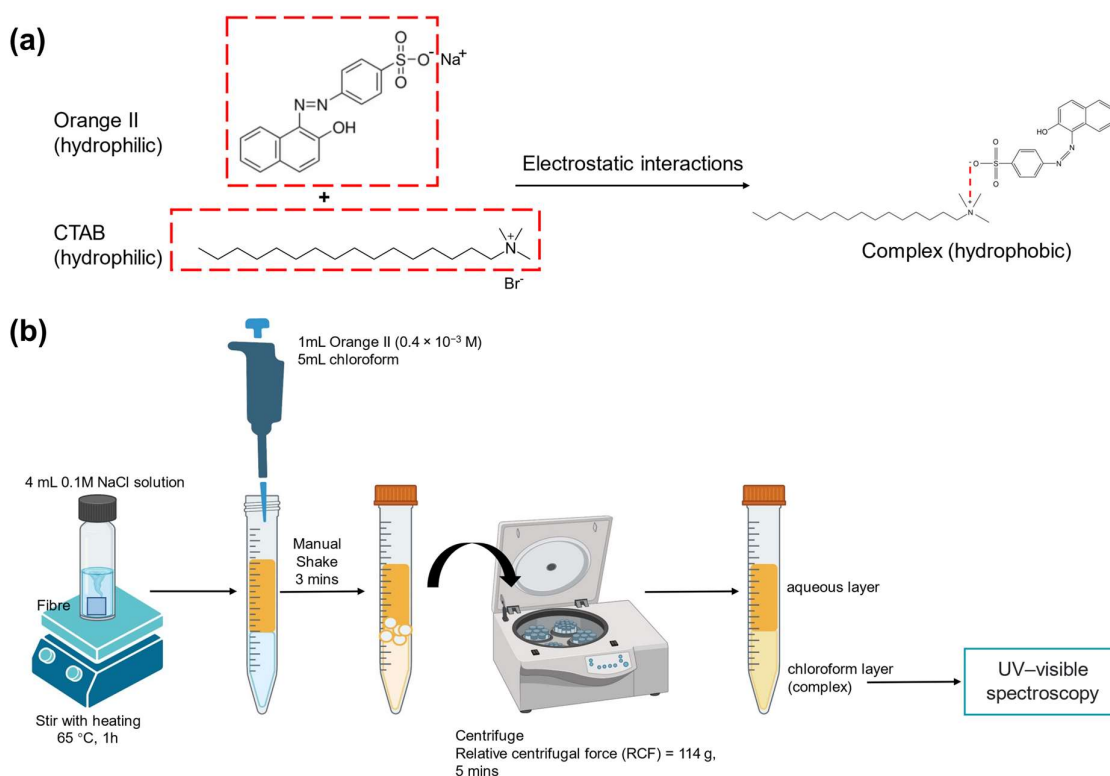

**Fig. S1** (a) Illustration of the interaction between orange II and CTAB; (b) Schematic diagram of the ion-pairing indirect spectrophotometric method (chloroform extraction). Created with BioRender.com

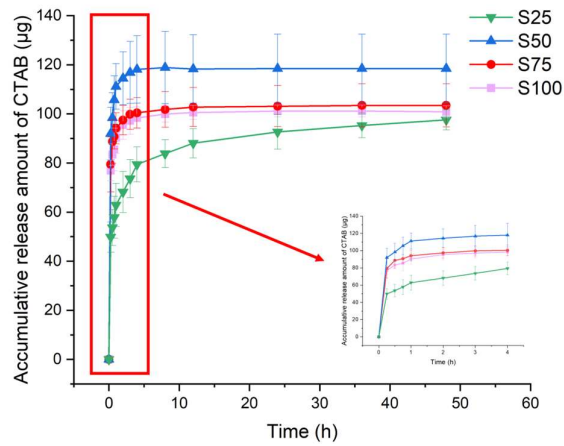

**Fig. S2** Cumulative release amount of CTAB ( $\mu\text{g}$ ) from the electrospun formulations over 48 h, with an inset showing the release profile for the first 4 hours. The maximum theoretical release amount of CTAB from S25, S50, S75, and S100 formulations is  $100.2 \pm 2.0 \mu\text{g}$ ,  $113.4 \pm 9.5 \mu\text{g}$ ,  $96.5 \pm 7.4 \mu\text{g}$  and  $95.6 \pm 5.3 \mu\text{g}$ , respectively. Data are given from three independent experiments as mean  $\pm$  S.D.

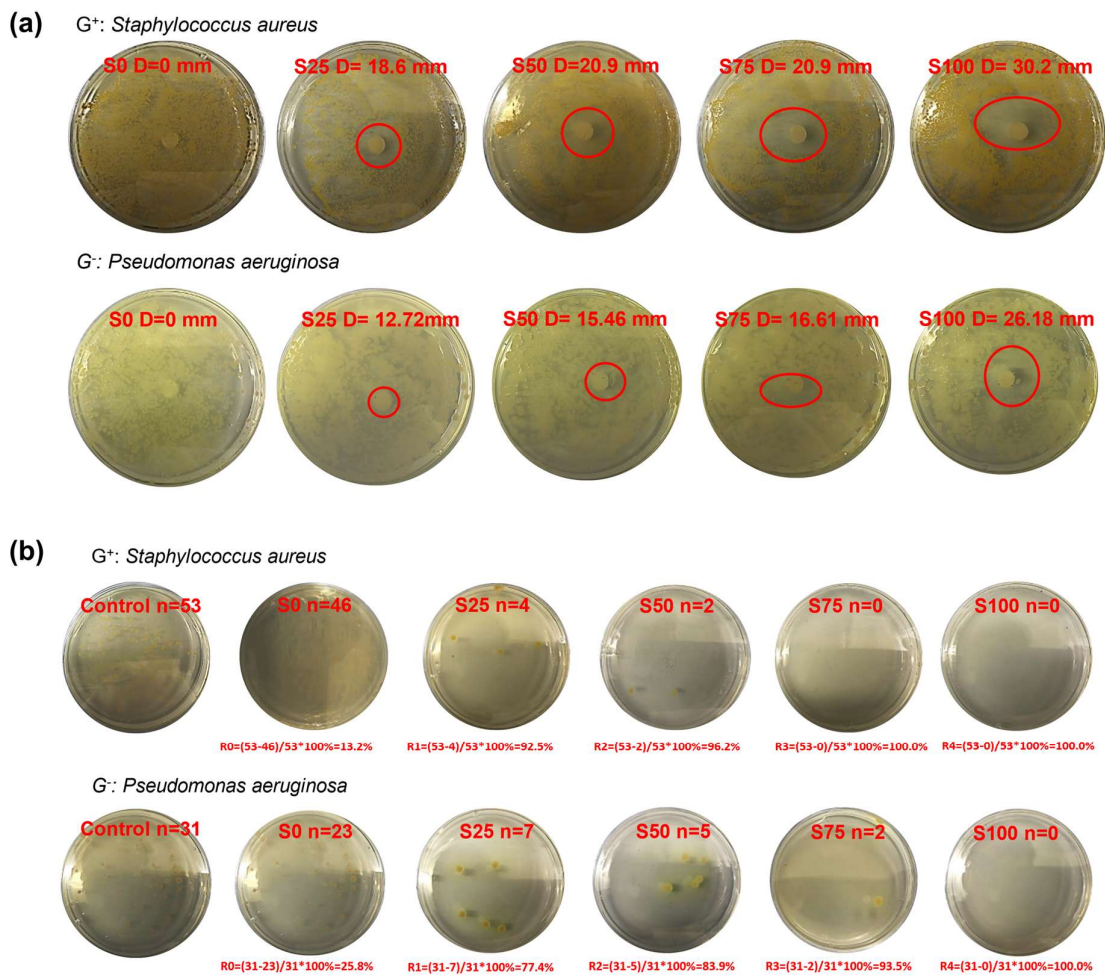

**Fig.S3** Exemplar images from (a) agar diffusion experiments (b) colony counting experiments.

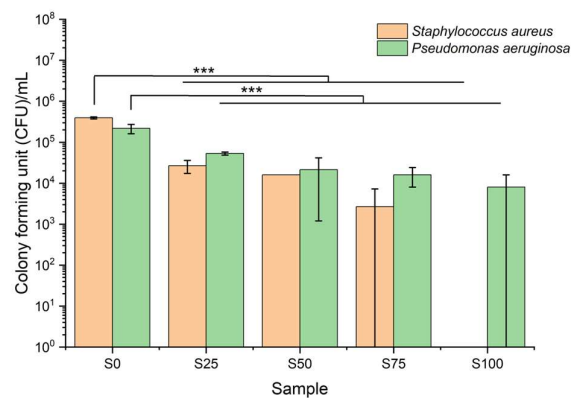

**Fig. S4** The results of the S0-S100 formulations in the colony-counting method, expressed as CFU/mL. Positive controls for *Staphylococcus aureus* and *Pseudomonas aeruginosa* were  $4.35 \times 10^5 \pm 5.68 \times 10^4$  CFU/mL and  $2.53 \times 10^5 \pm 5.62 \times 10^4$  CFU/mL, respectively. Single factor ANOVA with post hoc Tukey's test. Statistical significance: \*\*\* ( $\alpha=0.01$ , p-value  $\leq 0.001$ ).

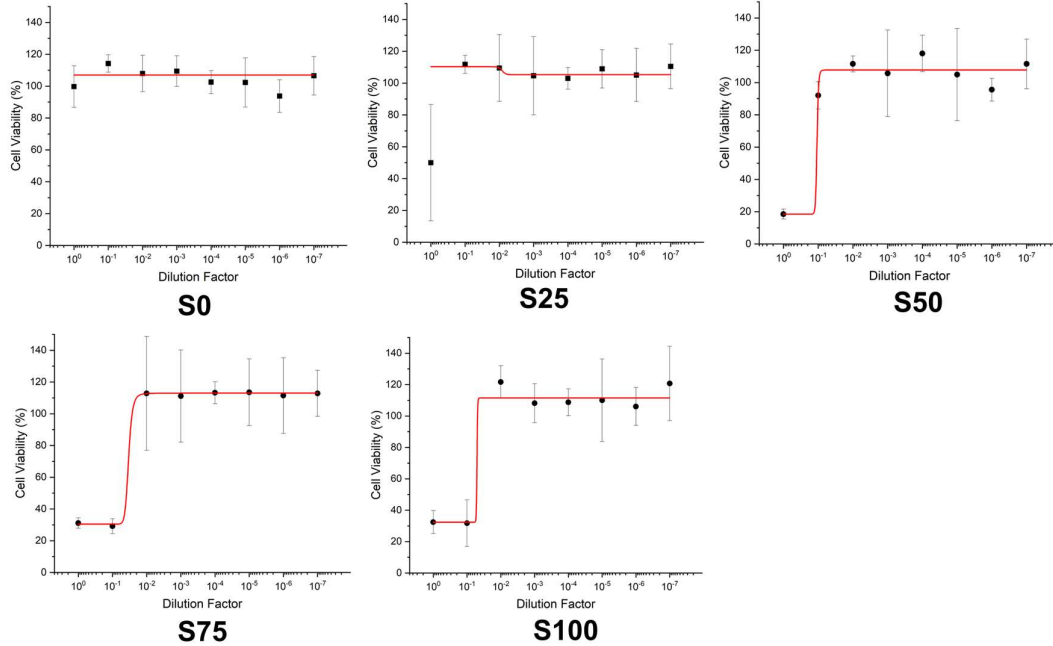

**Fig.S5** Cytotoxicity data (dilution factor versus cell viability) for samples S0 to S100 against the Vero E6 cell line, where cell viability (%) is calculated relative to negative control group data (untreated cells). The data are applicable to both RSV and SARS-CoV-2 cases. Positive cytotoxicity results are observed in the row corresponding to dilution factor = 10<sup>0</sup> for S1 and the rows corresponding to dilution factor = 10<sup>0</sup> and 10<sup>-1</sup> for S25, S50 and S100. A positive result refers to the presence of dead cells (decreased cell viability) resulting from cytotoxicity, and the dilution factor = initial volume / final volume.
